# Supplementary material for: Manganese-Induced Neurotoxicity through Impairment of Cross-Talk Pathways in Human Neuroblastoma Cell Line SH-SY5Y Differentiated with Retinoic Acid
Source: MDPI journal article supplement (doi:10.3390/toxics9120348), 2021-12-09
Supplement: s1 [file s1]

# Supplementary Materials: Manganese-Induced Neurotoxicity through Impairment of Cross-Talk Pathways in Human Neuroblastoma Cell Line *SH-SY5Y* Differentiated with Retinoic Acid

Raúl Bonne Hernández, Nadja C. de Souza-Pinto, Jos Kleinjans, Marcel van Herwijnen, Jolanda Piepers, Houman Moteshareie, Daniel Burnside and Ashkan Golshani

**Table S1.** Genes differentially expressed in RA-differentiated SH-SY5Y cells after exposure to MnCl<sub>2</sub> are listed below.

| Chemical Specie   | Effect          | Gene Symbol | Gene Name                                                                      |
|-------------------|-----------------|-------------|--------------------------------------------------------------------------------|
| MnCl <sub>2</sub> | Up-expression   | RASL11B     | Ras-like protein family member 11B                                             |
|                   |                 | SCLY        | Selenocysteine lyase                                                           |
|                   |                 | ABCA12      | ATP-binding cassette sub-family A member 12                                    |
|                   |                 | CORIN       | Atrial natriuretic peptide-converting enzyme                                   |
|                   |                 | GPD1L       | Glycerol-3-phosphate dehydrogenase 1-like protein                              |
|                   |                 | NDUFAF2     | NADH dehydrogenase [ubiquinone] 1 alpha subcomplex assembly factor 2           |
|                   |                 | RAC3        | Ras-related C3 botulinum toxin substrate 3                                     |
|                   |                 | TAF9B       | Transcription initiation factor TFIID subunit 9B                               |
|                   |                 | WLS         | Protein wntless homolog                                                        |
|                   |                 | MT-CO1      | Cytochrome c oxidase subunit 1                                                 |
|                   |                 | MT-CYB      | Cytochrome b                                                                   |
|                   |                 | MT-ND1      | NADH-ubiquinone oxidoreductase chain 1                                         |
|                   |                 | MT-ND5      | NADH-ubiquinone oxidoreductase chain 5                                         |
|                   |                 | MT-ND4      | NADH-ubiquinone oxidoreductase chain 4                                         |
|                   |                 | NTNG1       | Netrin-G1                                                                      |
|                   |                 | ROR1        | Inactive tyrosine-protein kinase transmembrane receptor ROR1                   |
|                   |                 | TRIM63      | E3 ubiquitin-protein ligase TRIM63                                             |
|                   |                 | C6orf48     | Protein G8                                                                     |
|                   |                 | ZNF157      | Zinc finger protein 157                                                        |
|                   |                 | AHNAK       | Neuroblast differentiation-associated protein AHNAK                            |
|                   |                 | STEAP3      | Metalloreductase STEAP3                                                        |
|                   |                 | RPS29       | Ribosomal protein S29                                                          |
|                   |                 | BCL2        | Apoptosis regulator Bcl-2                                                      |
|                   |                 | WDR4        | tRNA (guanine-N(7)-)-methyltransferase non-catalytic subunit WDR4              |
|                   |                 | CCNL2       | Cyclin-L2                                                                      |
|                   |                 | SCFD2       | Sec1 family domain-containing protein 2                                        |
|                   |                 | KIF26B      | Kinesin-like protein KIF26B                                                    |
|                   |                 | CHST15      | Carbohydrate sulfotransferase 15                                               |
|                   |                 | KIRREL3     | Kin of IRRE-like protein 3                                                     |
|                   |                 | RAB40B      | Ras-related protein Rab-40B                                                    |
|                   |                 | COLCA2      | Colorectal cancer associated 2                                                 |
|                   | Down-expression | WDR54       | WD repeat-containing protein 54                                                |
|                   |                 | PPP2R5B     | Serine/threonine-protein phosphatase 2A 56 kDa regulatory subunit beta isoform |
|                   |                 | C4orf6      | Uncharacterized protein encoded by LINC01587                                   |
|                   |                 | PLOD1       | Procollagen-lysine                                                             |
|                   |                 | CABP7       | Calcium-binding protein 7                                                      |
|                   |                 | TRIB3       | Tribbles homolog 3                                                             |
|                   |                 | SFXN3       | Sideroflexin-3                                                                 |

|  |           |                                                            |
|--|-----------|------------------------------------------------------------|
|  | DUSP3     | Dual specificity protein phosphatase 3                     |
|  | ALDOC     | Aldolase                                                   |
|  | GALNT18   | Polypeptide N-acetylgalactosaminyltransferase 18           |
|  | GAPDH     | Glyceraldehyde-3-phosphate dehydrogenase                   |
|  | TPI1      | Triosephosphate isomerase 1                                |
|  | HBEGF     | Proheparin-binding EGF-like growth factor                  |
|  | LOX       | Protein-lysine 6-oxidase                                   |
|  | PFKFB4    | 6-phosphofructo-2-kinase/fructose-2                        |
|  | ENO1      | Alpha-enolase                                              |
|  | ELL2      | RNA polymerase II elongation factor ELL2                   |
|  | PPP1R3C   | Protein phosphatase 1 regulatory subunit 3C                |
|  | DUSP4     | Dual specificity protein phosphatase 4                     |
|  | KIAA1045  | PHD finger protein 24                                      |
|  | BHLHE41   | Class E basic helix-loop-helix protein 41                  |
|  | SH3TC1    | SH3 domain and tetratricopeptide repeats 1                 |
|  | INSIG2    | Insulin-induced gene 2 protein                             |
|  | GDF15     | Growth differentiation factor 15                           |
|  | NTS       | Neurotensin/neuromedin N                                   |
|  | BHLHE40   | Class E basic helix-loop-helix protein 40                  |
|  | ANO3      | Anoctamin-3                                                |
|  | EMP1      | Epithelial membrane protein 1                              |
|  | HNF1A     | Hepatocyte nuclear factor 1-alpha                          |
|  | HILPDA    | Hypoxia-inducible lipid droplet-associated protein         |
|  | CCL27     | C-C motif chemokine 27                                     |
|  | IER3      | Radiation-inducible immediate-early gene IEX-1             |
|  | HS3ST2    | Heparan sulfate glucosamine 3-O-sulfotransferase 2         |
|  | P4HA1     | Prolyl 4-hydroxylase subunit alpha-1                       |
|  | NGEF      | Ephexin-1                                                  |
|  | LOXL3     | Lysyl oxidase homolog 3                                    |
|  | IL11      | Interleukin-11                                             |
|  | HRASLS    | Phospholipid-metabolizing enzyme A-C1                      |
|  | STC2      | Stanniocalcin-2                                            |
|  | ABCB6     | ATP-binding cassette sub-family B member 6                 |
|  | GAL       | Galanin peptides                                           |
|  | MTFP1     | Mitochondrial fission process protein 1                    |
|  | GABARAPL1 | Gamma-aminobutyric acid receptor-associated protein-like 1 |
|  | RAB20     | Ras-related protein Rab-20                                 |
|  | MAP1LC3B  | Microtubule-associated proteins 1A/1B light chain 3B       |
|  | PPFIA4    | Liprin-alpha-4                                             |
|  | KIAA1715  | Endoplasmic reticulum junction formation protein lunapark  |
|  | ZNF215    | Zinc finger protein 215                                    |
|  | RAB6B     | Ras-related protein Rab-6B                                 |
|  | MAGEC1    | Melanoma-associated antigen C1                             |
|  | C8orf58   | Uncharacterized protein C8orf58                            |
|  | HK2       | Hexokinase-2                                               |
|  | PDXK      | Pyridoxal kinase                                           |
|  | PRSS12    | Neurotrypsin                                               |
|  | SCRG1     | Scrapie-responsive protein 1                               |
|  | F2RL2     | Proteinase-activated receptor 3                            |
|  | MICALL2   | MICAL-like protein 2                                       |
|  | ANGPTL4   | Angiopoietin-related protein 4                             |
|  | MAP2K1    | Dual specificity mitogen-activated protein kinase kinase 1 |
|  | GTPBP2    | GTP binding protein 2                                      |
|  | ADORA2B   | Adenosine receptor A2b                                     |

|  |          |                                                                     |
|--|----------|---------------------------------------------------------------------|
|  | ISG20    | Interferon-stimulated gene 20 kDa protein                           |
|  | DDIT4    | DNA damage-inducible transcript 4 protein                           |
|  | RIN1     | Ras and Rab interactor 1                                            |
|  | FAM57A   | Protein FAM57A                                                      |
|  | CHRNA9   | Neuronal acetylcholine receptor subunit alpha-9                     |
|  | TNIP1    | TNFAIP3-interacting protein 1                                       |
|  | GYS1     | Glycogen [starch] synthase                                          |
|  | MPI      | Mannose-6-phosphate isomerase                                       |
|  | AQP10    | Aquaporin-10                                                        |
|  | TMEM45A  | Transmembrane protein 45A                                           |
|  | PHLDA2   | Pleckstrin homology-like domain family A member 2                   |
|  | ANKZF1   | Ankyrin repeat and zinc finger domain-containing protein 1          |
|  | PGA3     | Pepsin A-3                                                          |
|  | EBF1     | Transcription factor COE1                                           |
|  | BAIAP3   | BAI1 associated protein 3                                           |
|  | P4HB     | Protein disulfide-isomerase                                         |
|  | ARHGEF37 | Rho guanine nucleotide exchange factor 37                           |
|  | CYB5D1   | Cytochrome b5 domain containing 1                                   |
|  | ASCL2    | Achaete-scute homolog 2                                             |
|  | ZNF470   | Zinc finger protein 470                                             |
|  | NXPH4    | Neurexophilin-4                                                     |
|  | RAX      | Retinal homeobox protein Rx                                         |
|  | EDARADD  | Ectodysplasin-A receptor-associated adapter protein                 |
|  | ANKRD37  | Ankyrin repeat domain-containing protein 37                         |
|  | ANG      | Angiogenin                                                          |
|  | RIOK3    | Serine/threonine-protein kinase RIO3                                |
|  | STMN4    | Stathmin-4                                                          |
|  | ATF3     | Cyclic AMP-dependent transcription factor ATF-3                     |
|  | DHRS2    | Dehydrogenase/reductase SDR family member 2                         |
|  | MAFF     | Transcription factor Maff                                           |
|  | MYH7     | Myosin-7                                                            |
|  | DOK3     | Docking protein 3                                                   |
|  | SERTAD1  | SERTA domain-containing protein 1                                   |
|  | GOLGA8A  | Golgin subfamily A member 8A                                        |
|  | AKR1B10  | Aldo-keto reductase family 1 member B10                             |
|  | MAGEC2   | Melanoma-associated antigen C2                                      |
|  | MT-ND6   | NADH-ubiquinone oxidoreductase chain 6                              |
|  | RHOU     | Rho-related GTP-binding protein RhoU                                |
|  | LEMD1    | LEM domain containing 1                                             |
|  | FAM129A  | Protein Niban                                                       |
|  | BNIP3    | BCL2/adenovirus E1B 19 kDa protein-interacting protein 3            |
|  | DUSP5    | Dual specificity protein phosphatase 5                              |
|  | DPCD     | Protein DPCD                                                        |
|  | PGAM1    | Phosphoglycerate mutase 1                                           |
|  | PGM1     | Phosphoglucomutase-1                                                |
|  | GNAS     | Guanine nucleotide-binding protein G(s) subunit alpha isoforms XLas |
|  | BEND5    | BEN domain-containing protein 5                                     |
|  | IL13RA2  | Interleukin-13 receptor subunit alpha-2                             |
|  | FUT11    | Alpha-(1                                                            |
|  | SRPX2    | Sushi repeat-containing protein SRPX2                               |
|  | PGK1     | Phosphoglycerate kinase 1                                           |
|  | SPAG4    | Sperm-associated antigen 4 protein                                  |
|  | COX4I2   | Cytochrome c oxidase subunit 4 isoform 2                            |
|  | PTPRH    | Receptor-type tyrosine-protein phosphatase H                        |

|  |                 |                                                                     |
|--|-----------------|---------------------------------------------------------------------|
|  | HIST1H2BL       | Histone H2B type 1-L                                                |
|  | CA9             | Carbonic anhydrase 9                                                |
|  | ID4             | DNA-binding protein inhibitor ID-4                                  |
|  | C4orf47         | UPF0602 protein C4orf47                                             |
|  | TUBB2A          | Tubulin beta-2A chain                                               |
|  | BNIP3L          | BCL2/adenovirus E1B 19 kDa protein-interacting protein 3-like       |
|  | PFKP            | ATP-dependent 6-phosphofructokinase                                 |
|  | PDK1            | [Pyruvate dehydrogenase (acetyl-transferring)] kinase isozyme 1     |
|  | GAP43           | Neuromodulin                                                        |
|  | NDUFA4L2        | NADH dehydrogenase [ubiquinone] 1 alpha subcomplex subunit 4-like 2 |
|  | VKORC1          | Vitamin K epoxide reductase complex subunit 1                       |
|  | SPP1            | Osteopontin                                                         |
|  | ALDOA           | Fructose-bisphosphate aldolase A                                    |
|  | AK4             | Adenylate kinase 4                                                  |
|  | ODAM            | Odontogenic ameloblast-associated protein                           |
|  | GPR146          | Probable G-protein coupled receptor 146                             |
|  | TSPAN4          | Tetraspanin-4                                                       |
|  | CEP250          | Centrosome-associated protein CEP250                                |
|  | IRF7            | Interferon regulatory factor 7                                      |
|  | COL13A1         | Collagen alpha-1(XIII) chain                                        |
|  | ENSG00000164096 | Uncharacterized protein C4orf3                                      |
|  | P4HA2           | Prolyl 4-hydroxylase subunit alpha-2                                |
|  | PDK3            | [Pyruvate dehydrogenase (acetyl-transferring)] kinase isozyme 3     |
|  | SEC61G          | Protein transport protein Sec61 subunit gamma                       |
|  | SEMA5B          | Semaphorin-5B                                                       |
|  | IGF2            | Insulin-like growth factor II                                       |
|  | TTC39A          | Tetratricopeptide repeat domain containing                          |
|  | PDZK1           | Na(+)/H(+) exchange regulatory cofactor NHE-RF3                     |
|  | PPP1R13L        | RelA-associated inhibitor                                           |
|  | NDRG1           | Protein NDRG1                                                       |
|  | GBE1            | 1, 4-alpha-glucan-branching enzyme 1                                |
|  | RIMKLA          | N-acetylasparylglutamate synthase A                                 |
|  | SLC2A1          | Solute carrier family 2                                             |
|  | FAM162A         | Protein FAM162A                                                     |
|  | TFR2            | Transferrin receptor protein 2                                      |
|  | SH3D21          | SH3 domain containing 21                                            |
|  | MPP2            | MAGUK p55 subfamily member 2                                        |
|  | LGALS8          | Galectin 8                                                          |
|  | ADM             | ADM                                                                 |
|  | ENO2            | Gamma-enolase                                                       |
|  | PFKFB3          | 6-phosphofructo-2-kinase/fructose-2                                 |
|  | LDHA            | Lactate dehydrogenase A                                             |
|  | DDIT3           | DNA damage-inducible transcript 3 protein                           |
|  | BDKRB2          | B2 bradykinin receptor                                              |
|  | GPR56           | Adhesion G-protein coupled receptor G1                              |
|  | LOC730098       | HCG2040265                                                          |
|  | CCDC64B         | BICD family-like cargo adapter 2                                    |
|  | SLC16A3         | Monocarboxylate transporter 4                                       |
|  | HIST1H2BO       | Histone H2B type 1-O                                                |
|  | MTHFD1L         | Monofunctional C1-tetrahydrofolate synthase                         |
|  | VEGFA           | Vascular endothelial growth factor A                                |
|  | HIST1H2BH       | Histone H2B type 1-H                                                |
|  | NUDT18          | 8-oxo-dGDP phosphatase NUDT18                                       |
|  | HIST1H2BB       | Histone H2B type 1-B                                                |

**Table S2.** Genes differentially expressed in RA-differentiated SH-SY5Y cells after exposure to MnCl<sub>2</sub> are listed below.

| Chemical Specie | Effect          | Gene Symbol | Gene Name                                                                           |
|-----------------|-----------------|-------------|-------------------------------------------------------------------------------------|
| Mn(II)Cit       | Up-expression   | RASL11B     | Ras-like protein family member 11B                                                  |
|                 |                 | RAC2        | Ras-related C3 botulinum toxin substrate 2                                          |
|                 |                 | ABCA12      | ATP-binding cassette sub-family A member 12                                         |
|                 |                 | CORIN       | Atrial natriuretic peptide-converting enzyme                                        |
|                 |                 | GPD1L       | Glycerol-3-phosphate dehydrogenase 1-like protein                                   |
|                 |                 | KCNE2       | Potassium voltage-gated channel subfamily E member 2                                |
|                 |                 | RAC3        | Ras-related C3 botulinum toxin substrate 3                                          |
|                 |                 | TBC1D16     | TBC1 domain family member 16                                                        |
|                 |                 | MPPED2      | Metallophosphoesterase MPPED2                                                       |
|                 |                 | LDLRAD4     | Low-density lipoprotein receptor class A domain-containing protein 4                |
|                 |                 | NTRK3       | NT-3 growth factor receptor                                                         |
|                 |                 | MT-CO1      | Cytochrome c oxidase subunit 1                                                      |
|                 |                 | MT-CYB      | Cytochrome b                                                                        |
|                 |                 | MT-ND5      | NADH-ubiquinone oxidoreductase chain 5                                              |
|                 |                 | MT-ND4      | NADH-ubiquinone oxidoreductase chain 4                                              |
|                 |                 | BRINP3      | BMP/retinoic acid-inducible neural-specific protein 3                               |
|                 |                 | NTNG1       | Netrin-G1                                                                           |
|                 |                 | ROR1        | Inactive tyrosine-protein kinase transmembrane receptor ROR1                        |
|                 |                 | FNDC5       | Fibronectin type III domain-containing protein 5                                    |
|                 |                 | HSD17B8     | Estradiol 17-beta-dehydrogenase 8                                                   |
|                 |                 | C6orf48     | Protein G8                                                                          |
|                 |                 | ZNF157      | Zinc finger protein 157                                                             |
|                 |                 | AHNAK       | Neuroblast differentiation-associated protein AHNAK                                 |
|                 |                 | SOHLH2      | Spermatogenesis- and oogenesis-specific basic helix-loop-helix-containing protein 2 |
|                 |                 | STEAP3      | Metalloreductase STEAP3                                                             |
|                 |                 | RPS29       | Ribosomal protein S29                                                               |
|                 |                 | BCL2        | Apoptosis regulator Bcl-2                                                           |
|                 |                 | KIF26B      | Kinesin-like protein KIF26B                                                         |
|                 |                 | LETMD1      | LETM1 domain-containing protein 1                                                   |
|                 |                 | CHST15      | Carbohydrate sulfotransferase 15                                                    |
|                 |                 | KIRREL3     | Kin of IRRE-like protein 3                                                          |
|                 |                 | RAB40B      | Ras-related protein Rab-40B                                                         |
|                 |                 | TMC6        | Transmembrane channel-like protein 6                                                |
|                 |                 | COLCA2      | Colorectal cancer associated 2                                                      |
|                 | Down-expression | PLOD1       | Procollagen-lysine                                                                  |
|                 |                 | C22orf31    | Uncharacterized protein C22orf31                                                    |
|                 |                 | CABP7       | Calcium-binding protein 7                                                           |
|                 |                 | SFXN3       | Sideroflexin-3                                                                      |
|                 |                 | ALDOC       | Aldolase                                                                            |
|                 |                 | TPI1        | Triosephosphate isomerase 1                                                         |
|                 |                 | HBEGF       | Proheparin-binding EGF-like growth factor                                           |
|                 |                 | LOX         | Protein-lysine 6-oxidase                                                            |
|                 |                 | PFKFB4      | 6-phosphofructo-2-kinase/fructose-2                                                 |
|                 |                 | ELL2        | RNA polymerase II elongation factor ELL2                                            |
|                 |                 | PPP1R3C     | Protein phosphatase 1 regulatory subunit 3C                                         |
|                 |                 | DUSP4       | Dual specificity protein phosphatase 4                                              |
|                 |                 | INSIG2      | Insulin-induced gene 2 protein                                                      |
|                 |                 | GDF15       | Growth differentiation factor 15                                                    |
|                 |                 | ANO3        | Anoctamin-3                                                                         |

|  |          |                                                                     |
|--|----------|---------------------------------------------------------------------|
|  | HNF1A    | Hepatocyte nuclear factor 1-alpha                                   |
|  | IER3     | Radiation-inducible immediate-early gene IEX-1                      |
|  | HS3ST2   | Heparan sulfate glucosamine 3-O-sulfotransferase 2                  |
|  | NGEF     | Ephexin-1                                                           |
|  | IL11     | Interleukin-11                                                      |
|  | ABCB6    | ATP-binding cassette sub-family B member 6                          |
|  | MTFP1    | Mitochondrial fission process protein 1                             |
|  | SLC7A11  | Cystine/glutamate transporter                                       |
|  | ABCC3    | Canalicular multispecific organic anion transporter 2               |
|  | SLCO2B1  | Solute carrier organic anion transporter family member 2B1          |
|  | C8orf58  | Uncharacterized protein C8orf58                                     |
|  | HK2      | Hexokinase-2                                                        |
|  | F2RL2    | Proteinase-activated receptor 3                                     |
|  | MICALL2  | MICAL-like protein 2                                                |
|  | ANGPTL4  | Angiopoietin-related protein 4                                      |
|  | MAP2K1   | Dual specificity mitogen-activated protein kinase kinase 1          |
|  | GTPBP2   | GTP binding protein 2                                               |
|  | ISG20    | Interferon-stimulated gene 20 kDa protein                           |
|  | DDIT4    | DNA damage-inducible transcript 4 protein                           |
|  | RIN1     | Ras and Rab interactor 1                                            |
|  | FAM57A   | Protein FAM57A                                                      |
|  | CHRNA9   | Neuronal acetylcholine receptor subunit alpha-9                     |
|  | TNIP1    | TNFAIP3-interacting protein 1                                       |
|  | AQP10    | Aquaporin-10                                                        |
|  | TMEM45A  | Transmembrane protein 45A                                           |
|  | PHLDA2   | Pleckstrin homology-like domain family A member 2                   |
|  | P4HB     | Protein disulfide-isomerase                                         |
|  | ARHGEF37 | Rho guanine nucleotide exchange factor 37                           |
|  | NXPH4    | Neurexophilin-4                                                     |
|  | EDARADD  | Ectodysplasin-A receptor-associated adapter protein                 |
|  | ANKRD37  | Ankyrin repeat domain-containing protein 37                         |
|  | ATF3     | Cyclic AMP-dependent transcription factor ATF-3                     |
|  | MYH7     | Myosin-7                                                            |
|  | DOK3     | Docking protein 3                                                   |
|  | SERTAD1  | SERTA domain-containing protein 1                                   |
|  | AKR1B10  | Aldo-keto reductase family 1 member B10                             |
|  | MAGEC2   | Melanoma-associated antigen C2                                      |
|  | MT-ND6   | NADH-ubiquinone oxidoreductase chain 6                              |
|  | BNIP3    | BCL2/adenovirus E1B 19 kDa protein-interacting protein 3            |
|  | PGAM1    | Phosphoglycerate mutase 1                                           |
|  | PGM1     | Phosphoglucomutase-1                                                |
|  | GNAS     | Guanine nucleotide-binding protein G(s) subunit alpha isoforms XLas |
|  | BEND5    | BEN domain-containing protein 5                                     |
|  | IL13RA2  | Interleukin-13 receptor subunit alpha-2                             |
|  | FUT11    | Alpha-(1                                                            |
|  | SRPX2    | Sushi repeat-containing protein SRPX2                               |
|  | PGK1     | Phosphoglycerate kinase 1                                           |
|  | SPAG4    | Sperm-associated antigen 4 protein                                  |
|  | COX4I2   | Cytochrome c oxidase subunit 4 isoform 2                            |
|  | PTPRH    | Receptor-type tyrosine-protein phosphatase H                        |
|  | PFKP     | ATP-dependent 6-phosphofructokinase                                 |
|  | SRXN1    | Sulfiredoxin-1                                                      |
|  | PDK1     | [Pyruvate dehydrogenase (acetyl-transferring)] kinase isozyme 1     |
|  | NDUFA4L2 | NADH dehydrogenase [ubiquinone] 1 alpha subcomplex subunit 4-like 2 |

|  |                 |                                                 |
|--|-----------------|-------------------------------------------------|
|  | SPP1            | Osteopontin                                     |
|  | ALDOA           | Fructose-bisphosphate aldolase A                |
|  | AK4             | Adenylate kinase 4                              |
|  | ODAM            | Odontogenic ameloblast-associated protein       |
|  | GPR146          | Probable G-protein coupled receptor 146         |
|  | IRF7            | Interferon regulatory factor 7                  |
|  | ENSG00000164096 | Uncharacterized protein C4orf3                  |
|  | P4HA2           | Prolyl 4-hydroxylase subunit alpha-2            |
|  | IGF2            | Insulin-like growth factor II                   |
|  | TTC39A          | Tetratricopeptide repeat domain containing      |
|  | PDZK1           | Na(+)/H(+) exchange regulatory cofactor NHE-RF3 |
|  | PPP1R13L        | RelA-associated inhibitor                       |
|  | NDRG1           | Protein NDRG1                                   |
|  | CT47A11         | Cancer/testis antigen family 47                 |
|  | GBE1            | 1,4-alpha-glucan-branching enzyme 1             |
|  | SLC2A1          | Solute carrier family 2                         |
|  | FAM162A         | Protein FAM162A                                 |
|  | SH3D21          | SH3 domain containing 21                        |
|  | LGALS8          | Galectin 8                                      |
|  | ADM             | ADM                                             |
|  | ENO2            | Gamma-enolase                                   |
|  | PFKFB3          | 6-phosphofructo-2-kinase/fructose-2             |
|  | LDHA            | Lactate dehydrogenase A                         |
|  | DDIT3           | DNA damage-inducible transcript 3 protein       |
|  | GPR56           | Adhesion G-protein coupled receptor G1          |
|  | CCDC64B         | BICD family-like cargo adapter 2                |
|  | SLC16A3         | Monocarboxylate transporter 4                   |
|  | HIST1H2BO       | Histone H2B type 1-O                            |
|  | MTHFD1L         | Monofunctional C1-tetrahydrofolate synthase     |
|  | GREM1           | Gremlin-1                                       |
|  | HIST1H2BH       | Histone H2B type 1-H                            |
|  | NUDT18          | 8-oxo-dGDP phosphatase NUDT18                   |
|  | HIST1H2BB       | Histone H2B type 1-B                            |
